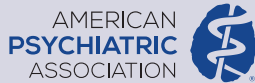

## ANNUAL MEETING ON DEMAND 2024

# Confronting Addiction from Prevention to Recovery

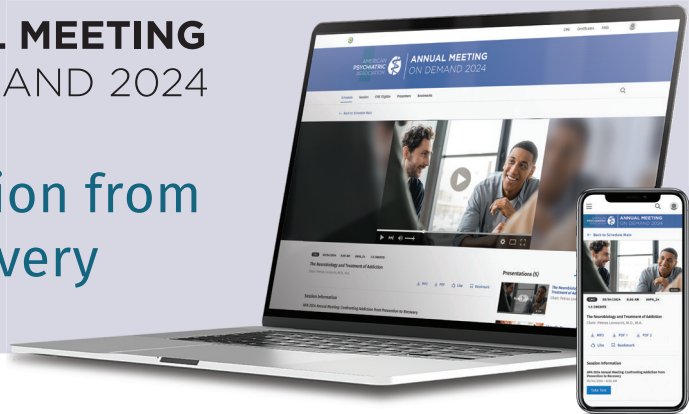

Access the latest peer-reviewed research, innovation, and ideas of today's most influential psychiatrists. Get access to On Demand meeting content in an easy-to-navigate on-line platform designed to save you time.

With On Demand, content is available anytime, anywhere, from any device, after the meeting is over, to keep you current with the latest in psychiatry.

### Access meeting content anytime, anywhere:

-  Find content quickly with advanced search
-  Earn CME credits for 2 years
-  Create playlists

### Meeting sessions include:

- Confronting addiction from prevention to recovery
- Review of clinical case studies
- Clinical practice tips and advancements in the field
- Latest peer reviewed research

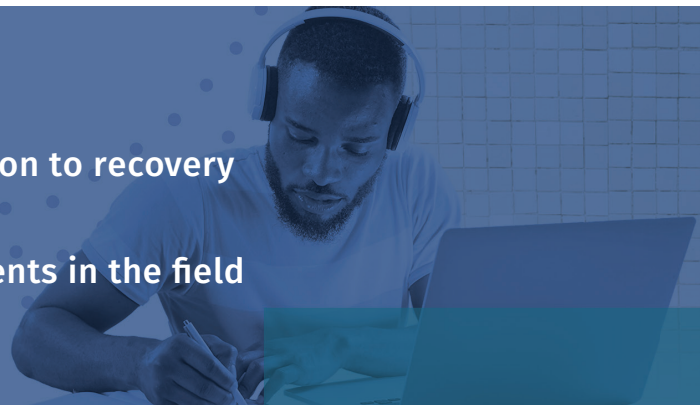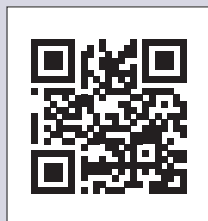

[APA.OnDemand.org](https://www.apa.org/ondemand)

Contact us:

800-501-2303

Monday–Friday 6am–5pm PT

\*The American Psychiatric Association (APA) is accredited by the Accreditation Council for Continuing Medical Education (ACCME) to provide Continuing Medical Education for physicians.

The APA designates the 2024 Annual Meeting On Demand Product for *AMA PRA Category 1 Credits™*. Physicians should claim only the credit commensurate with the extent of their participation in the activity.

New!

## Diagnostic and Statistical Manual of Mental Disorders, Fifth Edition, Text Revision (DSM-5-TR™)

American Psychiatric Association

The *Diagnostic and Statistical Manual of Mental Disorders*, Fifth Edition, Text Revision (DSM-5-TR), is the most comprehensive, current, and critical resource for clinical practice available to today's mental health clinicians and researchers. DSM-5-TR includes the fully revised text and references, updated diagnostic criteria and ICD-10-CM codes since DSM-5 was published in 2013. It features a new disorder, Prolonged Grief Disorder, as well as codes for suicidal behavior available to all clinicians of any discipline without the requirement of any other diagnosis.

With contributions from over 200 subject matter experts, this updated volume boasts the most current text updates based on the scientific literature. Now in four-color and with the ability to authenticate each printed copy, DSM-5-TR provides a cohesive, updated presentation of criteria, diagnostic codes, and text. This latest volume offers a common language for clinicians involved in the diagnosis and study of mental disorders and facilitates an objective assessment

of symptom presentations across a variety of clinical settings—inpatient, outpatient, partial hospital, consultation-liaison, clinical, private practice, and primary care.

2022 • 1,250 pages • ISBN 978-0-89042-575-6 • Hardcover • \$220.00 • Item #2575

2022 • 1,250 pages • ISBN 978-0-89042-576-3 • Paperback • \$170.00 • Item #2576

2022 • 1,250 pages • ISBN 978-0-89042-577-0 • eBook • \$136.00 • Item #2577

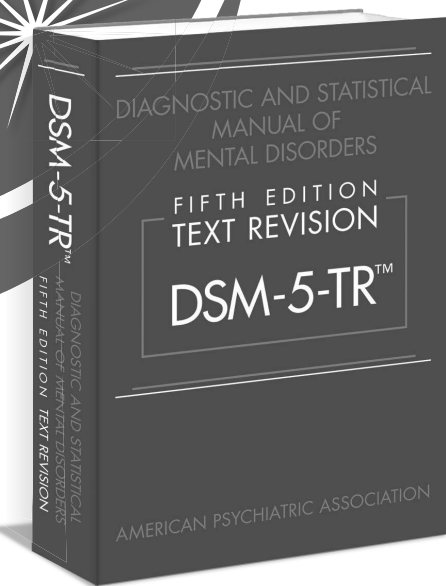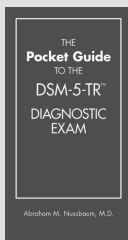

### The Pocket Guide to the DSM-5-TR® Diagnostic Exam

Abraham M. Nussbaum, M.D., M.T.S.

This book is the clinician's companion for using *DSM-5-TR™* in diagnostic interviews. Beginning with an introduction to the diagnostic interview, the *Pocket Guide* addresses the goals of the interview, provides an efficient structure for learning how to conduct one, reviews the screening questions, and then

explains the ways in which *DSM-5-TR™* impacts the interview.

2022 • 298 pages • ISBN 978-1-61537-357-4 • Paperback  
\$75.00 • Item #37357

2022 • 298 pages • ISBN 978-1-61537-358-1 • eBook  
\$60.00 • Item #37358

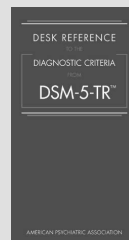

### Desk Reference to the Diagnostic Criteria from DSM-5-TR®

American Psychiatric Association

This handy reference provides quick access to the information essential to making a diagnosis. Designed to supplement *DSM-5-TR™*, this convenient guide will assist all mental health professionals as they integrate the *DSM-5-TR™* diagnostic criteria into their diagnoses.

2022 • 392 pages • ISBN 978-0-89042-579-4 • Paperback  
\$75.00 • Item #2579

2022 • 392 pages • ISBN 978-0-89042-580-0 • Spiralbound  
\$75.00 • Item #2580

2022 • 392 pages • ISBN 978-0-89042-581-7 • eBook  
\$60.00 • Item #2581

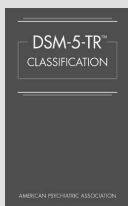

### DSM-5-TR® Classification

American Psychiatric Association

This handy *DSM-5-TR™ Classification* provides a ready reference to the DSM-5-TR classification of disorders, as well as the DSM-5-TR listings of ICD-10-CM codes for all DSM-5-TR diagnoses. To be used in tandem with DSM-5-TR™ or the *Desk Reference to the Diagnostic Criteria From DSM-5-TR™* the *DSM-5-TR™ Classification* makes

accessing the proper diagnostic codes quick and convenient.

2022 • 159 pages • ISBN 978-0-89042-583-1 • Spiralbound  
\$35.00 • Item #2583

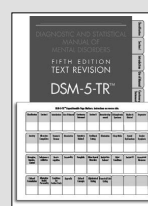

### DSM-5-TR® Repositionable Page Markers

American Psychiatric Association

The *DSM-5-TR™ Repositionable Page Markers* are designed to help you quickly and easily locate key information within DSM-5-TR™. The markers are made with a non-permanent adhesive and may be repositioned within your manual at any time.

2022 • 1 page • ISBN 978-0-89042-582-4  
Repositionable Page Markers • \$12.50 • Item #2582

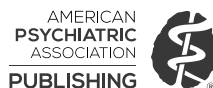

ORDER @ [www.appi.org](http://www.appi.org)  
Email: [appi@psych.org](mailto:appi@psych.org) | Toll Free: 1-800-368-5777

20% Discount for American Psychiatric Association Members  
25% Discount for APA Resident-Fellow Members

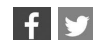

Priority Code AH2202

# PSYCHIATRYonline

Your Destination for Lifelong Learning in Psychiatry

The one-stop resource for information on diagnosis, treatment, guidelines, the latest research, and breaking news from the field.

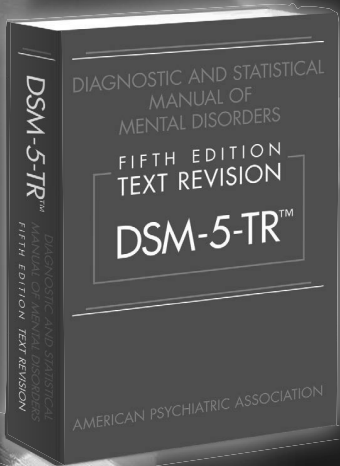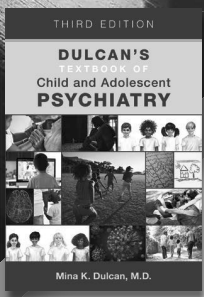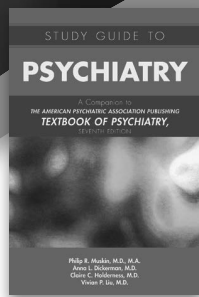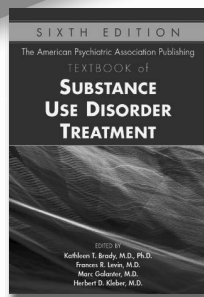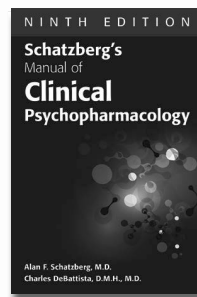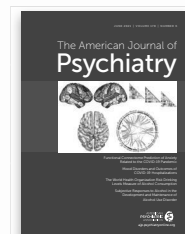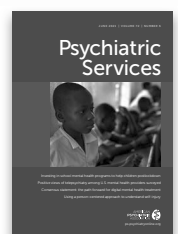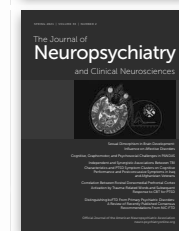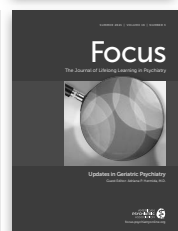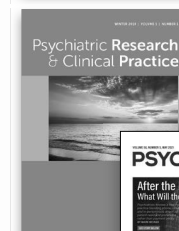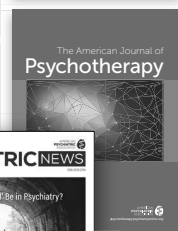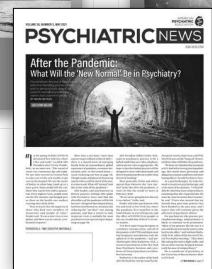

**PsychiatryOnline.org** is the platform for all American Psychiatric Association Publishing journals, *DSM-5-TR™*, and bestselling textbooks, as well as APA Practice Guidelines, and continuing medical education.

This is a one-stop resource for information on psychiatric diagnosis, treatment, guidelines, the latest research, and breaking news from the field. From a single location, users can search across all books and journals to find the most relevant content easier than ever.

Subscribe to products individually or to the DSM Select package that includes the DSM-5® library, books and select journals.

**Go to [www.appi.org](http://www.appi.org) to subscribe.**

*Institutional subscription options are available.*

*For more information contact: [institutions@psych.org](mailto:institutions@psych.org); 800-368-5777 ext. 3729*

AMERICAN  
PSYCHIATRIC  
ASSOCIATION  
PUBLISHING

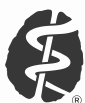

[psychiatryonline.org](http://psychiatryonline.org)

# NEW TITLES from AMERICAN PSYCHIATRIC ASSOCIATION PUBLISHING

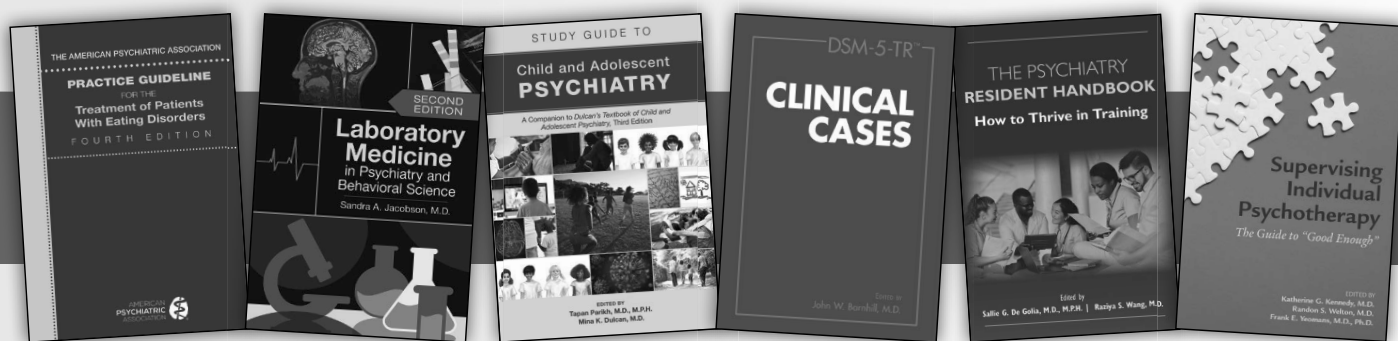

## The American Psychiatric Association Practice Guideline for the Treatment of Patients with Eating Disorders, Fourth Edition

American Psychiatric Association

The guideline focuses on evidence-based pharmacological, psychotherapeutic, and other nonpharmacological treatments for eating disorders, primarily anorexia nervosa, bulimia nervosa, and binge-eating disorder. In addition to statements related to assessment and treatment planning, the guideline provides direction on implementing these recommendations into clinical practice.

2023 • 114 pages • ISBN 978-0-89042-584-8 • Paperback • \$59.00 • Item #2584  
2023 • 114 pages • ISBN 978-0-89042-585-5 • eBook • \$47.00 • Item #2585

## Laboratory Medicine in Psychiatry and Behavioral Science, Second Edition

Sandra A. Jacobson, M.D.

This new volume contains detailed descriptions of more than 150 laboratory tests, 120 diseases and conditions—including, for the first time, COVID-19, 22q11.2 deletion syndrome, and DRESS syndrome—and 70 psychotropic medications. This edition also features appendixes that include algorithms, tables, and figures that aid in understanding and interpreting various laboratory tests and their underlying biology.

2023 • 750 pages • ISBN 978-1-61537-450-2 • Paperback • \$85.00 • Item #37450  
2023 • 750 pages • ISBN 978-1-61537-451-9 • eBook • \$68.00 • Item #37451

## Study Guide to Child and Adolescent Psychiatry

A Companion to Dulcan's Textbook of Child and Adolescent Psychiatry, Third Edition, Second Edition

Edited by Tapan Parikh, M.D., M.P.H., and Mina K. Dulcan, M.D.

This is a question-and-answer companion that allows you to evaluate your mastery of the subject matter as you progress through *Dulcan's Textbook of Child and Adolescent Psychiatry*, Third Edition. Questions are followed by an answer guide that references relevant text.

2023 • 360 pages • ISBN 978-1-61537-491-5 • Paperback • \$65.00 • Item #37491  
2023 • 360 pages • ISBN 978-1-61537-492-2 • eBook • \$52.00 • Item #37492

## DSM-5-TR<sup>®</sup> Clinical Cases

Edited by John W. Barnhill, M.D.

*DSM-5-TR Clinical Cases* clarifies and discusses psychiatric diagnosis with a particular focus on how diagnoses have evolved from DSM-5. This book presents a broad range of patient vignettes that cover the diagnostic waterfront. Each of the 104 cases is followed by a discussion by an expert clinician, who describes an approach to diagnosis through an exploration of psychiatric and personal history, symptom clusters, laboratory tests, and clinical ambiguities.

2023 • 416 pages • ISBN 978-1-61537-361-1 • Paperback • \$92.00 • Item #37361  
2023 • 416 pages • ISBN 978-1-61537-362-8 • eBook • \$74.00 • Item #37362

## The Psychiatry Resident Handbook How to Thrive in Training

Edited by Sallie G. De Golia, M.D., M.P.H., and Raziya Wang, M.D.

This guide deftly combines the wisdom of seasoned leaders in psychiatry residency and fellowship with the perspectives of current residents-in-training to deliver a holistic approach for making the most of the training years. Issues of identity, clinical practice, skill-building, career development, and balancing work and a personal life all are addressed in chapters that apply the information to real-life scenarios and encourage self-awareness and professional identity development.

2023 • 582 pages • ISBN 978-1-61537-411-3 • Paperback • \$67.00 • Item #37411  
2023 • 582 pages • ISBN 978-1-61537-412-0 • eBook • \$54.00 • Item #37412

## Supervising Individual Psychotherapy The Guide to "Good Enough"

Edited by Katherine G. Kennedy, M.D., Randon S. Welton, M.D., and Frank E. Yeomans, M.D., Ph.D.

Combining theoretical concepts with practical applications, it covers four key areas: the process of supervisor development; specific techniques used in supervision; common challenges that may arise in supervision; and supervision within various care settings and for specific populations, including a discussion of the possible effects of supervisee and supervisor race, gender identity, and sexual orientation on the supervisory process.

2023 • 392 pages • ISBN 978-1-61537-424-3 • Paperback • \$70.00 • Item #37424  
2023 • 392 pages • ISBN 978-1-61537-425-0 • eBook • \$56.00 • Item #37425

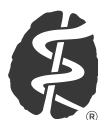

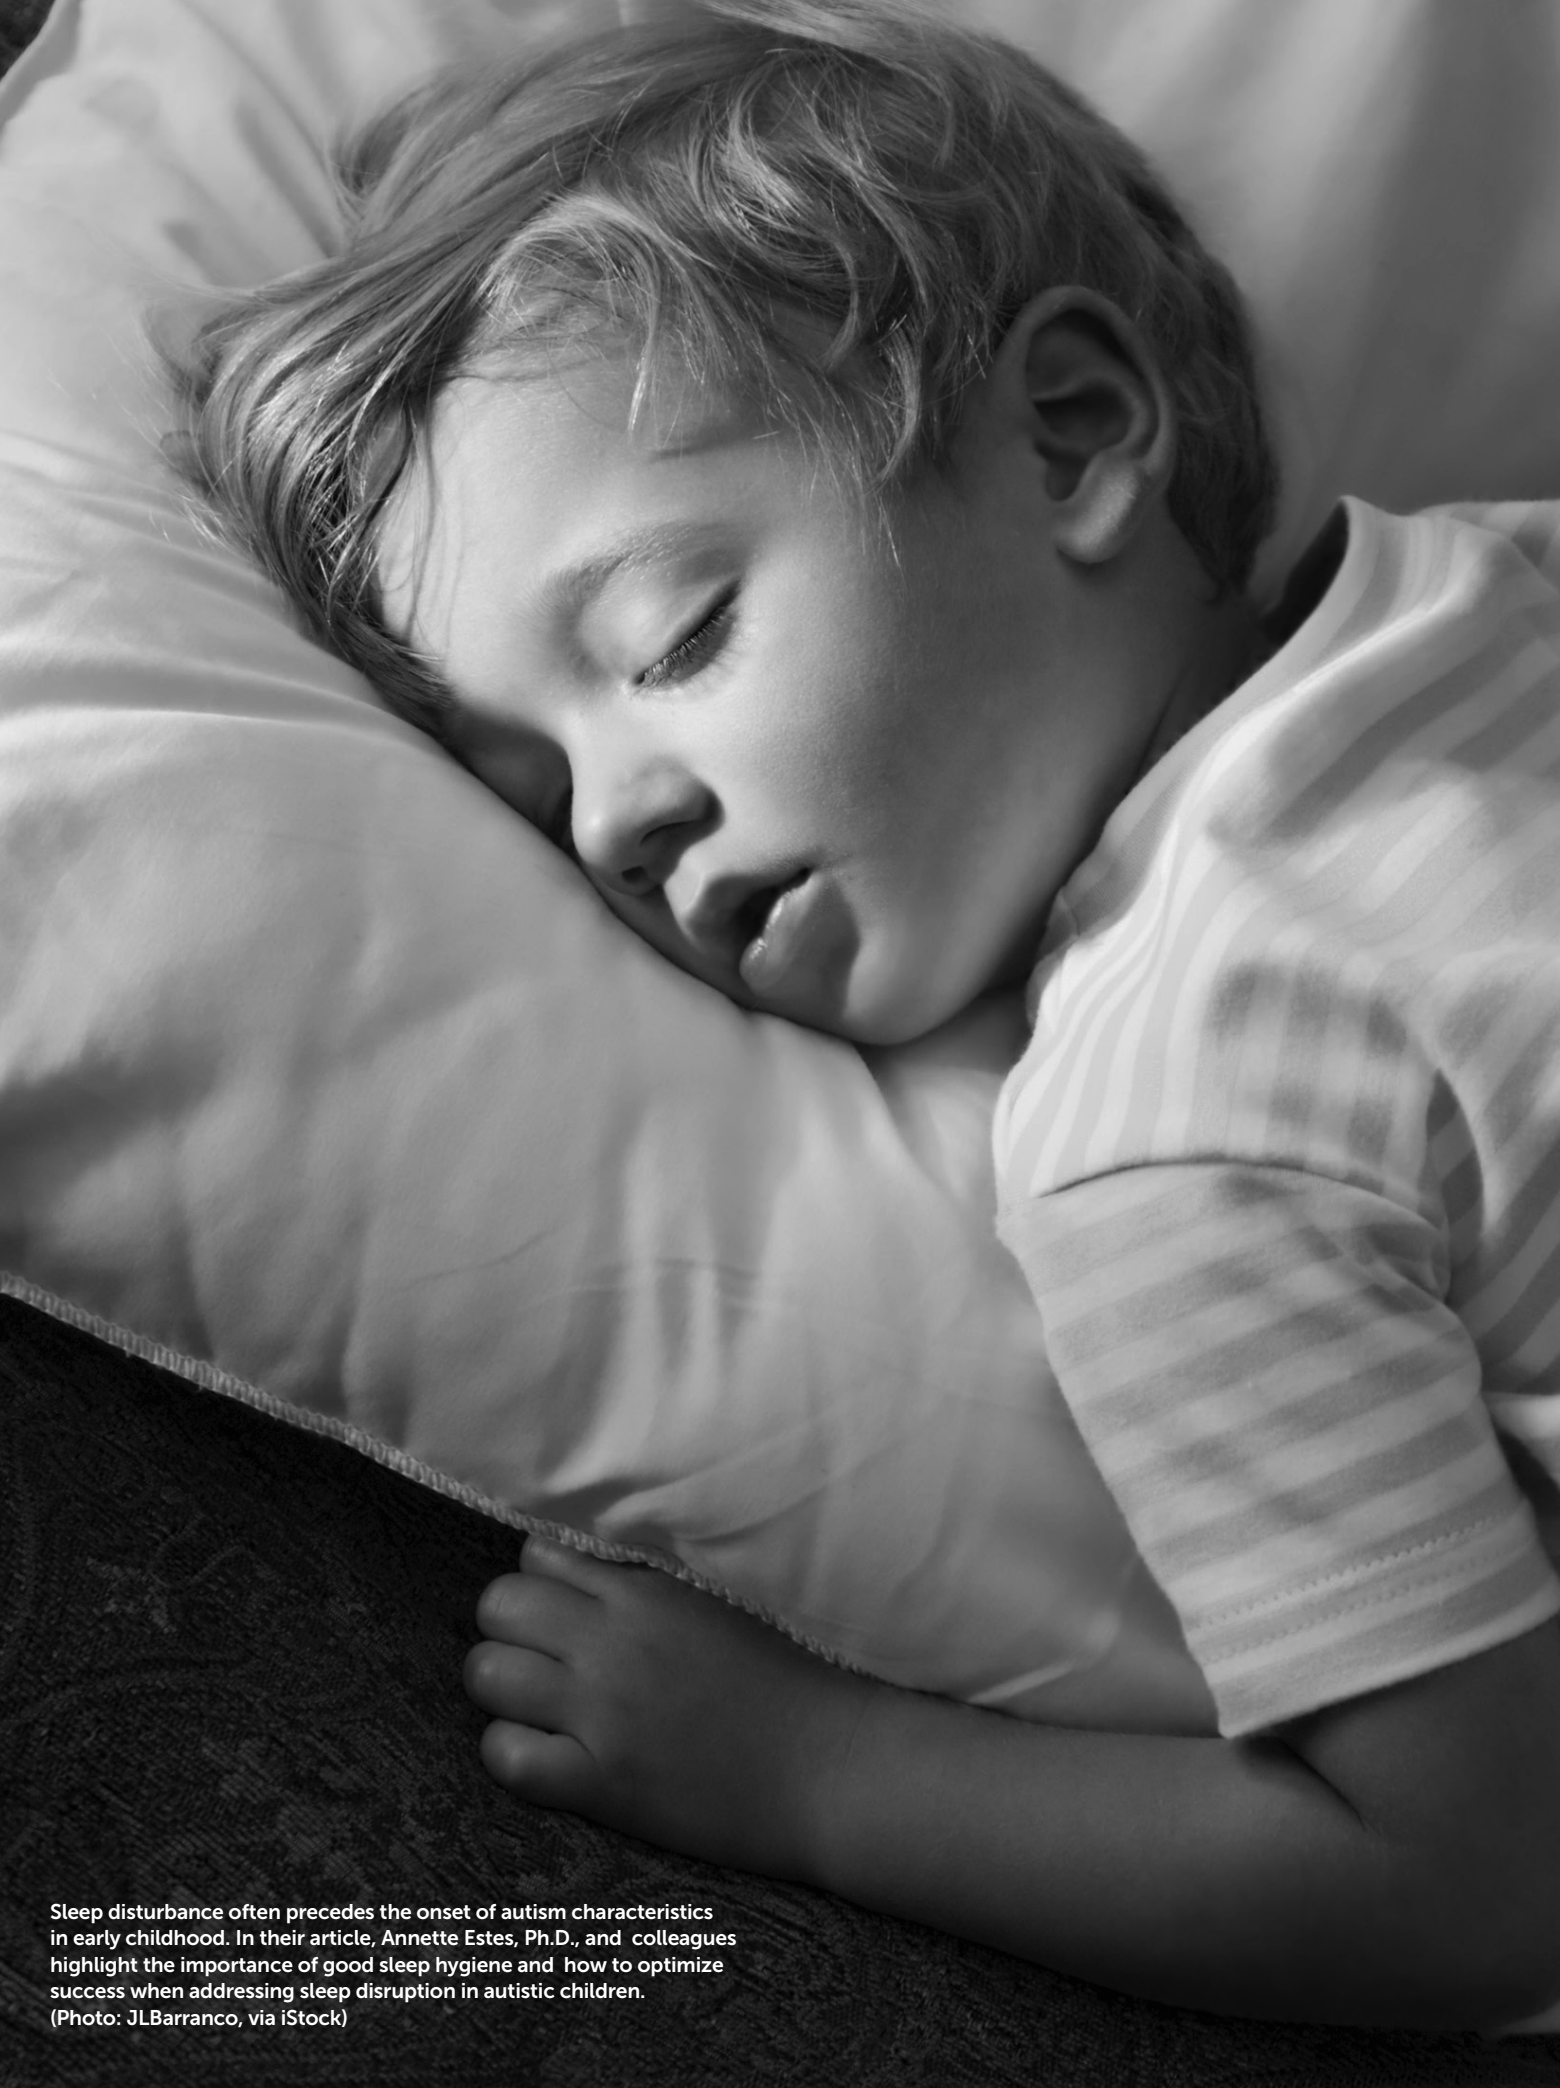

Sleep disturbance often precedes the onset of autism characteristics in early childhood. In their article, Annette Estes, Ph.D., and colleagues highlight the importance of good sleep hygiene and how to optimize success when addressing sleep disruption in autistic children. (Photo: JLBarranco, via iStock)
