SPRING 2024 | VOLUME 22 | NUMBER 2

# Focus

The Journal of Lifelong Learning in Psychiatry

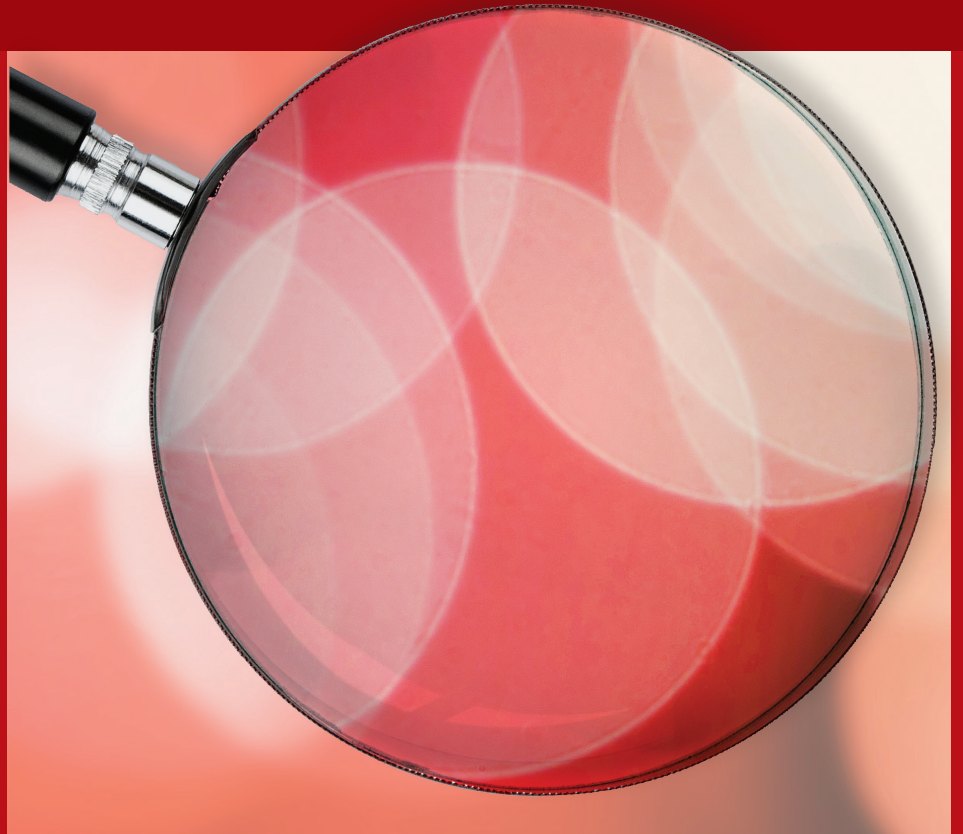

## Autism Across the Lifespan

Guest Editor: Deborah A. Bilder, M.D.

AMERICAN  
PSYCHIATRIC  
ASSOCIATION

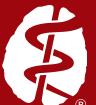

[focus.psychiatryonline.org](http://focus.psychiatryonline.org)
